# Supplementary material for: Effect of Homo-Fermentative Lactic Acid Bacteria Inoculants on Fermentation Characteristics and Bacterial and Fungal Communities in Alfalfa Silage
Source: MDPI journal article supplement (doi:10.3390/fermentation8110621), 2022-11-10
Supplement: s1 [file s1]

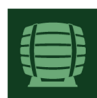**Table S1** Alpha diversity of bacterial and fungal community for alfalfa silage.

| Item <sup>1</sup> | Treatment | Sobs   | Chao1  | Shannon | Pielou_e | Simpson | Coverage |
|-------------------|-----------|--------|--------|---------|----------|---------|----------|
| <b>Bacterial</b>  |           |        |        |         |          |         |          |
| Material          |           | 399.52 | 439.19 | 6.92    | 0.81     | 0.98    | 0.99     |
| Mid DM            | CTR       | 566.74 | 640.16 | 7.22    | 0.79     | 0.97    | 0.99     |
|                   | INO       | 375.60 | 427.20 | 6.30    | 0.75     | 0.94    | 0.98     |
| High DM           | CTR       | 373.38 | 423.75 | 6.34    | 0.75     | 0.96    | 0.99     |
|                   | INO       | 280.72 | 307.98 | 6.07    | 0.75     | 0.96    | 0.99     |
| SEM               |           | 30.18  | 36.05  | 0.13    | 0.01     | 0.00    | 0.00     |
| <b>Fungal</b>     |           |        |        |         |          |         |          |
| Material          |           | 89.80  | 95.02  | 4.26    | 0.66     | 0.90    | 1.00     |
| Mid DM            | CTR       | 63.65  | 64.48  | 3.27    | 0.55     | 0.79    | 1.00     |
|                   | INO       | 70.70  | 71.53  | 3.95    | 0.64     | 0.88    | 1.00     |
| High DM           | CTR       | 37.65  | 37.70  | 2.45    | 0.52     | 0.65    | 1.00     |
|                   | INO       | 54.80  | 55.88  | 2.81    | 0.49     | 0.72    | 1.00     |
| SEM               |           | 4.32   | 4.70   | 0.16    | 0.02     | 0.03    | 0.00     |

<sup>1</sup>Mid DM = alfalfa ensiled at mid DM; High DM = alfalfa ensiled at high DM; CTR = no additive; INO = inoculated with Land O'Lakes inoculant (*Pediococcus acidilactici*, *Enterococcus faecium* and *Lactobacillus plantarum*) to achieve a final application rate of 165,000 cfu of lactic acid bacteria (LAB)/g of fresh forage weight.
